# Supplementary material for: Coordinated inflammatory responses dictate Marburg virus control by reservoir bats
Source: Springer Nature journal article supplement (doi:10.1038/s41467-024-46226-7), 2024-02-28
Supplement: 41467_2024_46226_MOESM1_ESM.pdf [file 41467_2024_46226_MOESM1_ESM.pdf]

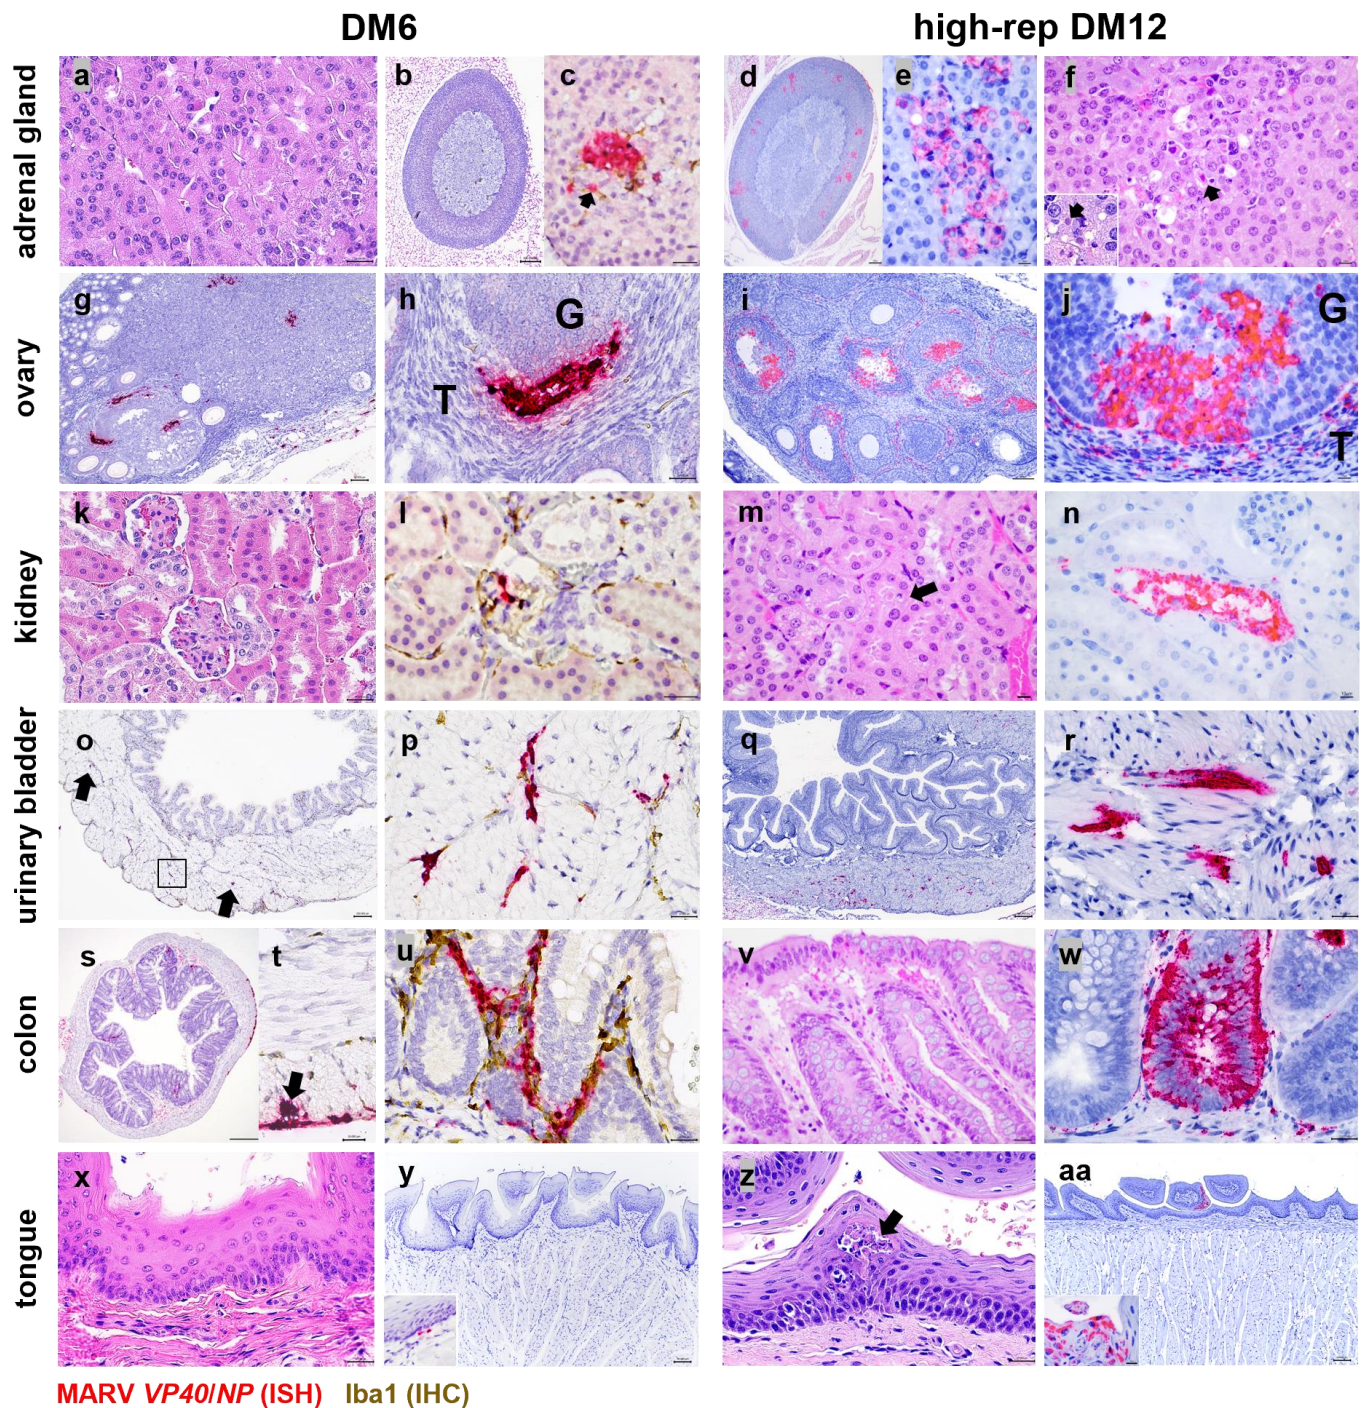

**Supplementary Fig. 1 | Histologically-resolvable and Marburg virus disease (MVD)-like viral tissue/cell tropism in IM bats.**

**a**, H&E staining;  $n=5$  bats. Bar (scale):  $20\mu\text{m}$ . **b**, MARV ISH showing lack of MARV replication foci. Bar:  $200\mu\text{m}$ . **c**, Dual MARV ISH (red) and Iba1 IHC (brown). MARV RNA in tissue macrophages (MΦ, arrow) and adrenal cortical cells. Bar:  $10\mu\text{m}$ . **d**, MARV ISH signal in inflammatory foci of high-replicating (high-rep) DM12 bats. Bar:  $200\mu\text{m}$ . **e**, MARV ISH signal in adrenal cortical cells. Bar:  $10\mu\text{m}$ . **f**, H&E. CPE of MARV in adrenal cortical cells include cytoplasmic vacuolation, occasional necrosis (arrow) and rare eosinophilic to amphophilic cytoplasmic inclusions (arrow, inset);  $n=3$  bats. Bar:  $10\mu\text{m}$ . **g**, MARV ISH. Bar:  $80\mu\text{m}$ . **h**, MARV ISH. G: granulosa cells, T: theca cells. Bar:  $20\mu\text{m}$ . **i**, MARV ISH. Bar:  $100\mu\text{m}$ . **j**, MARV ISH. Bar:  $10\mu\text{m}$ . **k**, H&E;  $n=5$  bats. Bar:  $20\mu\text{m}$ . **l**, Dual ISH-IHC. MARV RNA in Iba1<sup>+</sup> glomerular cells. Bar:  $10\mu\text{m}$ . **m**, H&E. CPE of MARV in renal cortical epithelial cells include cytoplasmic vacuolation and occasional pyknosis (arrow);  $n=3$  bats. Bar:  $10\mu\text{m}$ . **n**, MARV ISH. Bar:  $10\mu\text{m}$ . **o**, Dual ISH-IHC. Scattered MARV RNA in bladder wall (arrows). Bar:  $200\mu\text{m}$ . **p**, Dual ISH-IHC. Intense MARV RNA within Iba1<sup>+</sup> tissue MΦ. Bar:  $20\mu\text{m}$ . **q**, MARV ISH. Bar:  $80\mu\text{m}$ . **r**, Intense MARV ISH signal within smooth muscle cells. Bar:  $20\mu\text{m}$ . **s**, MARV ISH. Bar:  $200\mu\text{m}$ . **t-u**, Dual ISH-IHC. **t**, MARV RNA within Iba1<sup>+</sup> tissue MΦ, mesothelial cells and focally within smooth muscle cells (arrow). **u**, Intense MARV signal within Iba1<sup>+</sup> lamina propria MΦ. Bars:  $20\mu\text{m}$ . **v**, H&E. Intraepithelial and lamina propria hemorrhage;  $n=1$  bat. Bar:  $10\mu\text{m}$ . **w**, MARV ISH. Bar:  $20\mu\text{m}$ . **x**, H&E;  $n=5$  bats. Bar:  $20\mu\text{m}$ . **y**, MARV ISH. Bar:  $80\mu\text{m}$ . **z**, H&E. Focus of epithelial cell necrosis (arrow);  $n=1$  bat. Bar:  $20\mu\text{m}$ . **aa**, MARV ISH. Bar:  $80\mu\text{m}$ . Inset: MARV RNA in epithelial cells (bar:  $10\mu\text{m}$ ). Hematoxylin counterstain (all ISH/dual assays).



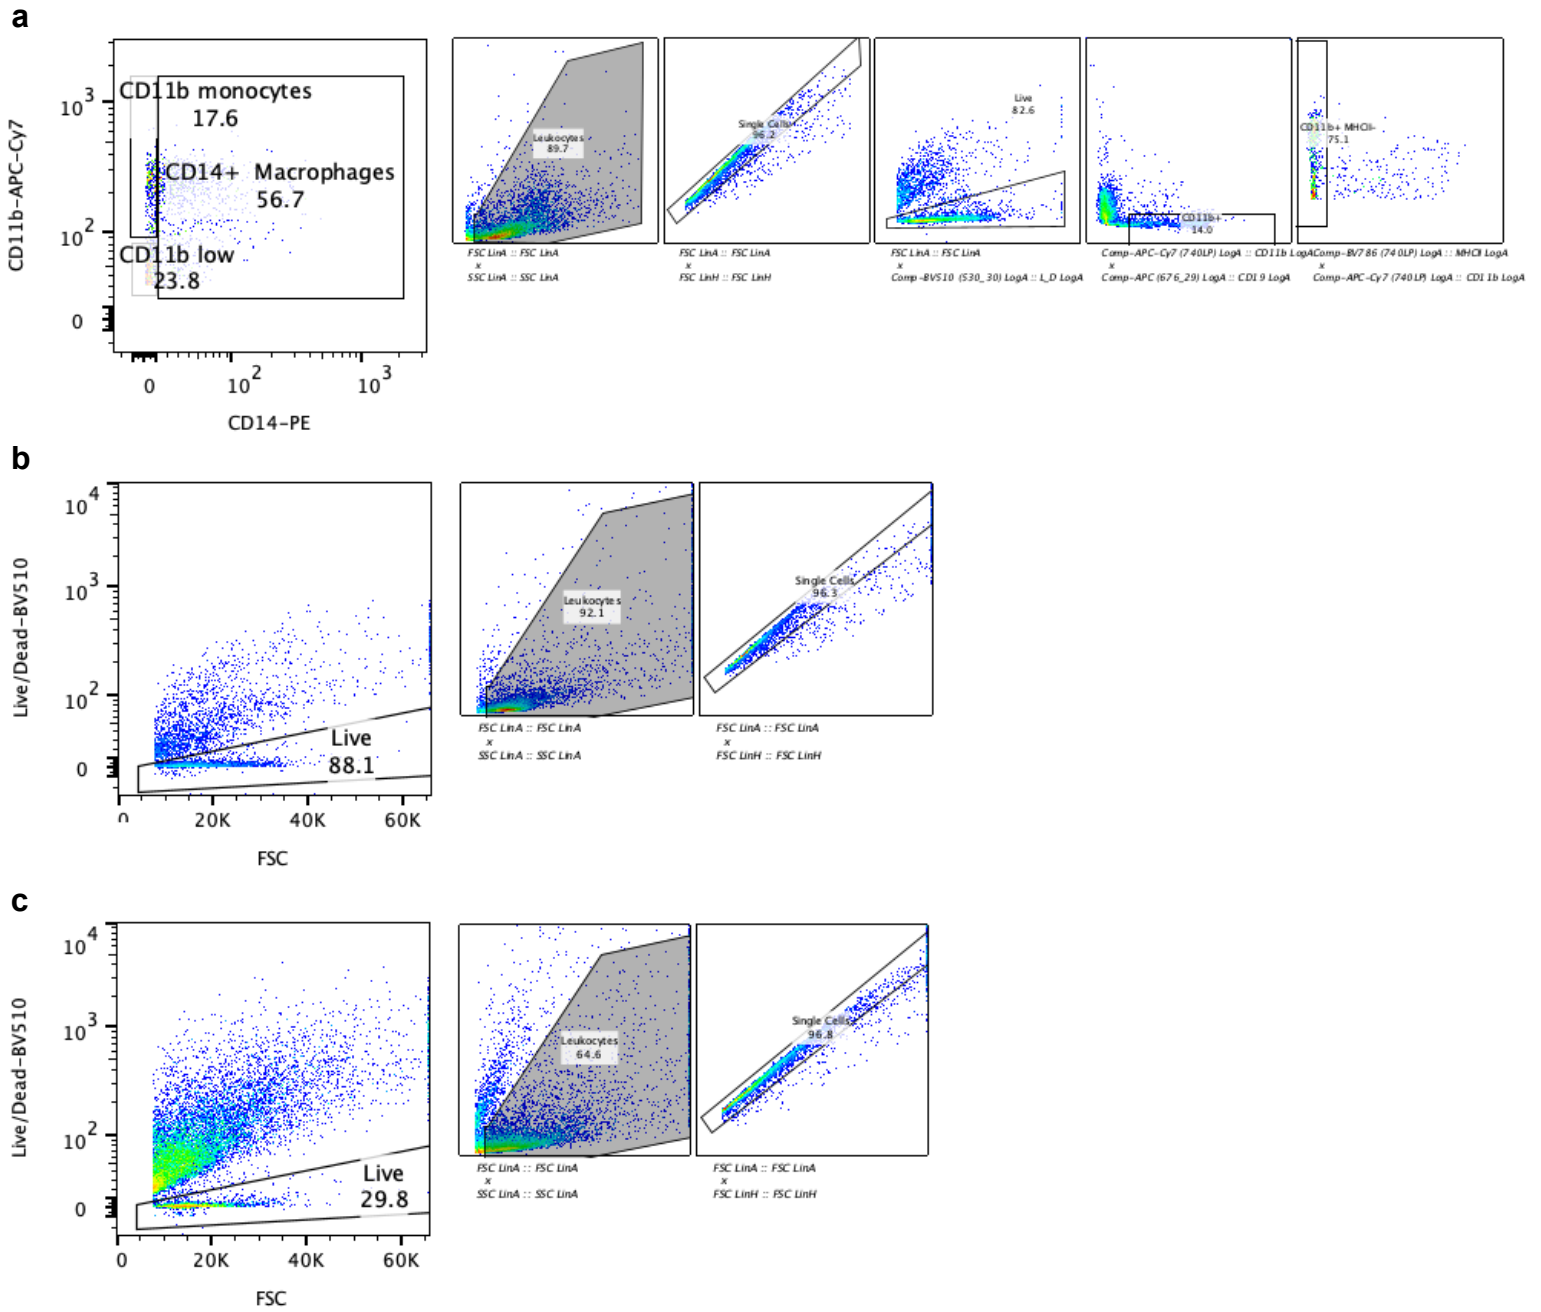

**Supplementary Fig. 2 | Flow cytometric analysis and gating ancestry of immune cell populations.**

**a**, Splenocytes from a representative bat were live/dead stained, then gated for leukocytes, single cells, live cells, then specific cell types as indicated. Viable cell proportions were used to calculate the total cells per tissue per animal. **b-c**, Axillary lymph node (ALN) cells from a representative Dex bat (**b**) or Neg bat (**c**) with gating ancestry.

| <b>Target mRNA</b>                  | <b>GenBank Entry Weblink</b>                                                                                          | <b>RNAscope Catalog ID</b> | <b>Probe Design Notes</b>                                         |
|-------------------------------------|-----------------------------------------------------------------------------------------------------------------------|----------------------------|-------------------------------------------------------------------|
| <b><i>CD14</i></b>                  | <a href="https://www.ncbi.nlm.nih.gov/nuccore/XM_016166396.1">https://www.ncbi.nlm.nih.gov/nuccore/XM_016166396.1</a> | 861218                     | 20ZZ probe named Rae-CD14 targeting 164-1146 of XM_016166396.1    |
| <b><i>CD79a</i></b>                 | <a href="https://www.ncbi.nlm.nih.gov/nuccore/XM_016129923.1">https://www.ncbi.nlm.nih.gov/nuccore/XM_016129923.1</a> | 861228                     | 20ZZ probe named Rae-CD79A targeting 2-957 of XM_016129923.1      |
| <b><i>CD3e</i></b>                  | <a href="https://www.ncbi.nlm.nih.gov/nuccore/XM_016155454.1">https://www.ncbi.nlm.nih.gov/nuccore/XM_016155454.1</a> | 861248                     | 20ZZ probe named Rae-CD3E targeting 109-1067 of XM_016155454.1    |
| <b><i>TNF</i></b>                   | <a href="https://www.ncbi.nlm.nih.gov/nuccore/XM_016121699.1">https://www.ncbi.nlm.nih.gov/nuccore/XM_016121699.1</a> | 878031-C2                  | 20ZZ probe named Rae-TNF targeting 359-1490 of XM_016121699.1     |
| <b><i>IL10</i></b>                  | <a href="https://www.ncbi.nlm.nih.gov/nuccore/XM_016129276.1">https://www.ncbi.nlm.nih.gov/nuccore/XM_016129276.1</a> | 878041-C2                  | 20ZZ probe named Rae-IL10 targeting 2-1244 of XM_016129276.1      |
| <b><i>IL6</i></b>                   | <a href="https://www.ncbi.nlm.nih.gov/nuccore/XM_016159525.1">https://www.ncbi.nlm.nih.gov/nuccore/XM_016159525.1</a> | 878051-C2                  | 20ZZ probe named Rae-IL6 targeting 3060-4182 of XM_016159525.1    |
| <b>Marburg virus 371bat NP/VP40</b> | <a href="https://www.ncbi.nlm.nih.gov/nuccore/FJ750958">https://www.ncbi.nlm.nih.gov/nuccore/FJ750958</a>             | 853531                     | 39ZZ probe named V-MARV-NP-VP40 targeting 3060-4182 of FJ750958.1 |
| <b>ERB PPIB</b>                     | <a href="https://www.ncbi.nlm.nih.gov/nuccore/XM_016141088.1">https://www.ncbi.nlm.nih.gov/nuccore/XM_016141088.1</a> | 573731                     | 20ZZ probe named Rae-PPIB targeting 71-974 of XM_016141088.1      |

**Supplementary Table 1. | ERB- or MARV-specific RNA probes used for ISH assays in this study.**

| Cohort                                | Neg     |      |         |         |         | Dex     |         |         |         |         | M6          |         |                    |         |         | M12                 |                     |         |                    | DM6                |         |             |      |                    | low-rep DM12        |         | high-rep DM12 |         |            |
|---------------------------------------|---------|------|---------|---------|---------|---------|---------|---------|---------|---------|-------------|---------|--------------------|---------|---------|---------------------|---------------------|---------|--------------------|--------------------|---------|-------------|------|--------------------|---------------------|---------|---------------|---------|------------|
|                                       | Bat1    | Bat2 | Bat3    | Bat4    | Bat5    | Bat1    | Bat2    | Bat3    | Bat4    | Bat5    | Bat1        | Bat2    | Bat3               | Bat4    | Bat5    | Bat1                | Bat2                | Bat3    | Bat4               | Bat1               | Bat2    | Bat3        | Bat4 | Bat5               | Bat1                | Bat2    | Bat3          | Bat4    | Bat5       |
| Liver                                 | 0 (n=3) | -    | 0 (n=4) | 0 (n=3) | 0 (n=3) | 0 (n=3) | 0 (n=3) | 0 (n=3) | 0 (n=3) | 0 (n=3) | 1 (n=3)     | 1 (n=3) | 2 (n=3)            | 1 (n=3) | 2 (n=4) | 0 (n=3)             | 0 (n=3)             | 0 (n=3) | 0 (n=3)            | 3 (n=3)            | 3 (n=3) | 3 (n=3)     | 3    | 3 (n=4)            | 0 (n=3)             | 0 (n=3) | 3 (n=4)       | 3 (n=4) | 4 (n=4)    |
| Spleen                                | 0 (n=3) | -    | 0 (n=4) | 0 (n=3) | 0 (n=3) | 0 (n=3) | 0 (n=3) | 0 (n=3) | 0 (n=3) | 0 (n=3) | 2 (n=3)     | 1 (n=3) | 1 (n=2)<br>2 (n=1) | 0 (n=3) | 2       | 1 (n=1)/<br>0 (n=2) | 1 (n=2)/<br>0 (n=1) | 0 (n=3) | 1 (n=1)<br>0 (n=2) | 3 (n=3)            | -       | 4 (n=4)     | 2    | 3 (n=3)            | 0 (n=3)             | 0 (n=3) | 3 (n=4)       | 3 (n=4) | 3 (n=4)    |
| Axillary lymph node                   | 0 (n=3) | -    | 0 (n=4) | 0 (n=3) | -       | -       | -       | 0 (n=3) | 0 (n=3) | 0 (n=3) | 2 (n=3)     | 0 (n=3) | 1 (n=3)            | 0 (n=3) | 1       | 0 (n=3)             | 1 (n=1)/<br>0 (n=2) | 0 (n=3) | 0 (n=3)            | 2 (n=2)<br>1 (n=1) | -       | 3 (n=4)     | 2    | 2 (n=3)            | 1 (n=1)/<br>0 (n=2) | -       | 2 (n=4)       | 1 (n=4) | 2 (n=4)    |
| Bone marrow                           | 0 (n=3) | -    | 0       | -       | -       | -       | -       | -       | -       | 0 (n=3) | 0 (n=3)     | -       | -                  | -       | 0       | -                   | -                   | -       | -                  | -                  | -       | -           | 0    | 0 (n=3)            | -                   | -       | -             | -       | -          |
| Mesenteric lymph node                 | -       | -    | 0       | -       | -       | -       | -       | -       | -       | -       | -           | -       | -                  | -       | 0       | -                   | -                   | -       | -                  | -                  | -       | 3           | -    | 3                  | -                   | -       | 2             | 3       | 2          |
| Lymph node, other                     | 0 (n=3) | -    | -       | -       | -       | -       | -       | -       | -       | -       | -           | -       | -                  | -       | 0       | -                   | 0                   | -       | -                  | -                  | -       | 3 (n=3)     | 2    | 1 (n=3)            | -                   | -       | -             | -       | 3          |
| Skin, inoculation site                | -       | -    | -       | -       | -       | -       | -       | -       | -       | -       | 3 (SC only) | -       | -                  | -       | 0       | -                   | -                   | -       | -                  | -                  | -       | -           | -    | -                  | -                   | -       | -             | 2       | 1          |
| Skin, other - caudal abdomen/perineum | -       | -    | -       | -       | -       | -       | -       | -       | -       | -       | 0           | -       | -                  | -       | 2       | -                   | -                   | -       | -                  | -                  | -       | 3           | -    | -                  | -                   | -       | 0             | 0       | 1          |
| Skeletal muscle                       | 0 (n=3) | -    | -       | -       | -       | -       | -       | -       | -       | 0 (n=3) | -           | -       | -                  | -       | 0       | -                   | 0                   | -       | -                  | -                  | -       | 0           | -    | -                  | -                   | -       | 0             | -       | -          |
| Thymus                                | -       | -    | -       | -       | -       | 0 (n=3) | -       | -       | -       | -       | -           | -       | -                  | -       | 0 (n=4) | -                   | -                   | -       | -                  | -                  | -       | 0 (n=3)     | 3    | 2 (n=1)<br>1 (n=3) | -                   | -       | -             | -       | -          |
| Aorta                                 | 0 (n=3) | -    | -       | -       | -       | 0 (n=3) | -       | -       | -       | -       | 0 (n=3)     | -       | -                  | -       | 0 (n=4) | -                   | 0                   | -       | -                  | -                  | 0 (n=3) | 0 (n=3)     | 0    | 0 (n=4)            | -                   | -       | 0             | -       | 0          |
| Heart                                 | 0 (n=3) | -    | 0 (n=3) | -       | -       | 0 (n=3) | -       | -       | 0 (n=3) | 0 (n=3) | 0 (n=3)     | 0 (n=3) | -                  | -       | -       | 0                   | 0                   | -       | -                  | 0 (n=3)            | 0 (n=3) | 0 (n=3)     | 1    | 0 (n=4)            | -                   | -       | 1             | -       | 0          |
| Lung                                  | 0 (n=3) | -    | 0 (n=3) | -       | -       | 0 (n=3) | -       | -       | 0 (n=3) | 0 (n=3) | 0 (n=3)     | -       | 0 (n=3)            | 0 (n=4) | -       | 0                   | 0                   | -       | -                  | 0 (n=3)            | 0 (n=3) | -           | -    | 1 (n=3)            | -                   | -       | 1             | 1       | 2          |
| Trachea                               | 0 (n=3) | -    | 0       | -       | -       | 0 (n=3) | -       | -       | -       | -       | -           | -       | -                  | -       | 0 (n=4) | -                   | 0                   | -       | -                  | -                  | -       | 1 (n=3)     | 0    | 0 (n=3)<br>1 (n=1) | -                   | -       | -             | 0       | 0          |
| Esophagus                             | 0 (n=3) | -    | 0       | -       | -       | 0 (n=3) | -       | -       | -       | -       | -           | -       | -                  | -       | 0       | -                   | 0                   | -       | -                  | -                  | -       | 2 (n=3)     | 0    | 1 (n=3)            | -                   | -       | 2             | 0       | 1          |
| Stomach                               | -       | -    | 0       | -       | -       | -       | -       | -       | -       | -       | -           | -       | -                  | -       | -       | -                   | 0                   | -       | -                  | -                  | -       | 0           | -    | 1                  | -                   | -       | 3             | 3       | 3          |
| Pancreas                              | -       | -    | 0       | -       | -       | -       | -       | -       | -       | -       | -           | -       | -                  | -       | 0       | -                   | 0                   | -       | -                  | -                  | -       | 2           | -    | -                  | -                   | -       | 1             | 0       | 1          |
| Small intestine                       | -       | -    | 0       | -       | -       | -       | -       | -       | -       | -       | -           | -       | -                  | -       | 0       | -                   | 0                   | -       | -                  | -                  | -       | 2           | -    | 2                  | -                   | -       | 3             | 3       | 3          |
| Mesentery                             | -       | -    | 0       | -       | -       | -       | -       | -       | -       | -       | -           | -       | -                  | -       | 0       | -                   | 0                   | -       | -                  | -                  | -       | 2           | 2    | 1                  | -                   | -       | 2             | 2       | 2          |
| Colon                                 | -       | -    | 0       | -       | -       | -       | -       | -       | -       | -       | -           | -       | -                  | -       | 0       | 0                   | 0                   | -       | -                  | -                  | -       | 2           | -    | 2                  | -                   | 0 (n=3) | 3             | 2       | 3          |
| Colonic lymph node                    | -       | -    | 0       | -       | -       | -       | -       | -       | -       | -       | -           | -       | -                  | -       | 0       | 0                   | 0                   | -       | -                  | -                  | -       | -           | -    | -                  | 0 (n=3)             | -       | 2             | 2 (n=3) | -          |
| Kidney                                | 0 (n=3) | -    | -       | -       | -       | 0 (n=3) | -       | -       | 0 (n=3) | 0 (n=3) | 0 (n=3)     | 0 (n=3) | 0 (n=3)            | 0 (n=4) | -       | 0                   | 0                   | -       | -                  | 0 (n=3)            | 0 (n=3) | 0 (n=3)     | 1    | 1 (n=4)            | -                   | -       | 1             | 1       | 1          |
| Urinary bladder                       | -       | -    | 0       | -       | -       | -       | -       | -       | -       | -       | 0 (n=3)     | -       | -                  | -       | 0       | -                   | -                   | -       | -                  | -                  | -       | -           | -    | 2                  | -                   | -       | 1             | 2       | 3          |
| Adrenal gland                         | 0 (n=3) | -    | -       | -       | -       | -       | -       | -       | -       | -       | -           | 0 (n=3) | -                  | -       | 0 (n=4) | -                   | 0                   | -       | -                  | 0 (n=1)            | 0 (n=3) | 0 (n=3)     | -    | 1 (n=2)<br>0 (n=2) | -                   | -       | 3             | 2       | 3          |
| Vagina                                | -       | -    | -       | -       | -       | -       | -       | -       | -       | -       | -           | -       | -                  | -       | 0       | -                   | -                   | -       | -                  | -                  | -       | 1 (SM only) | -    | -                  | -                   | -       | -             | 0       | 1          |
| Uterus                                | -       | -    | -       | -       | -       | -       | -       | -       | -       | -       | -           | -       | -                  | -       | 0       | -                   | -                   | -       | -                  | -                  | -       | 1           | -    | -                  | -                   | -       | -             | 3       | 3          |
| Ovary                                 | -       | -    | -       | -       | -       | -       | -       | -       | -       | -       | -           | -       | -                  | -       | -       | -                   | -                   | -       | -                  | -                  | -       | 3           | -    | -                  | -                   | -       | -             | -       | 3          |
| Testis                                | -       | -    | 0       | -       | -       | -       | -       | -       | -       | -       | -           | -       | -                  | -       | -       | -                   | -                   | -       | -                  | -                  | -       | -           | -    | 0                  | -                   | -       | 0             | -       | -          |
| Penis                                 | -       | -    | -       | -       | -       | -       | -       | -       | -       | -       | 1 (SM only) | -       | -                  | -       | -       | -                   | -                   | -       | -                  | -                  | -       | -           | -    | -                  | -                   | -       | 1 (ET)        | -       | -          |
| Brain                                 | -       | -    | 0       | -       | -       | -       | -       | -       | -       | -       | 0           | -       | -                  | -       | 0       | -                   | 0                   | -       | -                  | -                  | -       | -           | -    | 0                  | -                   | -       | -             | 0       | 0          |
| Eye                                   | -       | -    | -       | -       | -       | -       | -       | -       | -       | -       | 0           | -       | -                  | -       | -       | -                   | 0                   | -       | -                  | -                  | -       | -           | -    | -                  | -                   | -       | 0             | 1       | 1          |
| Tongue                                | -       | -    | 0       | -       | -       | -       | -       | -       | -       | -       | -           | -       | -                  | -       | 0       | -                   | 0                   | -       | -                  | -                  | -       | 1 (SM only) | -    | -                  | -                   | -       | 2             | 1       | 1          |
| Salivary gland                        | 0 (n=3) | -    | 0       | -       | -       | -       | -       | -       | -       | 0 (n=3) | 0 (n=3)     | -       | -                  | -       | 0       | -                   | 0                   | -       | -                  | -                  | -       | 0 (n=3)     | 0    | -                  | -                   | -       | 0             | 0       | 1 (M-type) |

**Supplementary Table 2. | MARV ISH scores by tissue and cohort in individual ERBs.**

For all ISH assays, bat tissues were scored semi-quantitatively: 0 = MARV not detected; 1 = minimally MARV<sup>+</sup> (1-10% of tissue); 2 = occasionally MARV<sup>+</sup> (11-25%); 3 = frequently MARV<sup>+</sup> (25-75%); 4 = extensively MARV<sup>+</sup> (>75%). Assay replicates per bat were n=1 unless specified in parentheses. Microscopic features and/or cell types assessed in tissues: liver (hepatocytes, Kupffer cells, MΦ, endothelial cells); spleen (MΦ, follicular dendritic cells [fDCs], ellipsoids/endothelium); axillary lymph node (LN; fDCs, MΦ, capsule); mesenteric LN (MΦ, capsule); LN, other (perirenal, mediastinal, submandibular); skin, inoculation site (epidermis, adipocytes, fibroblasts, MΦ, sebaceous glands); skin, other (epidermis, adipocytes, sebaceous glands); skeletal muscle (pectoral, epaxial); heart (valve, endocardium, interstitium); lung (alveolar septa, circulating mononuclear cells); trachea (epithelium, submucosa, adventitia); esophagus (smooth muscle fibers); stomach (interstitium, epithelium); pancreas (acinar cells); small intestine (interstitium, epithelium, smooth muscle fibers, mesothelium); mesentery (adipocytes, mesothelial cells); colon (interstitium, epithelium, smooth muscle fibers, mesothelium); colonic LN (MΦ, fDCs, capsule); kidney (glomerulus, renal tubules, interstitium); urinary bladder (smooth muscle fibers, interstitium); adrenal gland (cortical cells, interstitium); vagina (smooth muscle fibers, epithelium); uterus (smooth muscle fibers, mesothelium, glandular epithelium); ovary (granulosa/theca cells); penis (epithelium, submucosa); eye (conjunctival epithelium); tongue (epithelium, submucosa); salivary gland (acinar cells). SC = subcutis; SM = submucosa; ET = epithelium; M-type = mucous type acinar cells.
